# Supplementary material for: Astaxanthin (ATX) enhances the intestinal mucosal functions in immunodeficient mice
Source: Royal Society of Chemistry journal article supplement (doi:10.1039/c9fo02555c), 2020-01-01
Supplement: c9fo02555c1.pdf [file c9fo02555c1.pdf]

### Supplementary Information

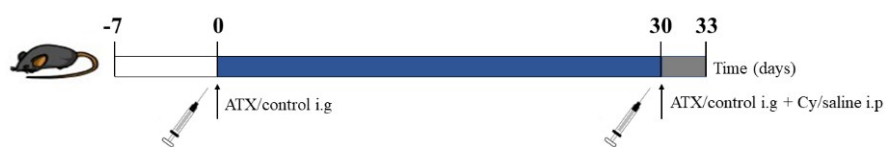

**Fig. S1** Schematic diagram of animal treatment

**Table S1** Primer sequences for qPCR amplification

| <b>Gene</b>    | <b>Forward</b>         | <b>Reverse</b>             |
|----------------|------------------------|----------------------------|
| Reg-3 $\gamma$ | TTCCTGTCCTCCATGATCAAAA | CATCCACCTCTGTTGGGTCA       |
| Lysozyme       | GAGACCGAAGCACCGACTATG  | CGGTTTTGACATTGTGTCGC       |
| Cryptdin-4     | GACCCAGAAGGATCTGCTCT   | GCATATCAGATCTCTCGACGATTTTC |

**Table S2** Primer sequences for fecal microbiota analysis

| <b>Gene</b>                    | <b>Forward</b>           | <b>Reverse</b>           |
|--------------------------------|--------------------------|--------------------------|
| 16s                            | ACTCCTACGGGAGGCAGCAG     | ATTACCGCGGCTGCTGG        |
| <i>Prevotella spp.</i>         | GGTGTCGGCTTAAGTGCCAT     | CGGA(C/T)GTAAGGGCCGTGC   |
| <i>Bifidobacteria</i>          | GGGATGCTGGTGTGGAAGAGA    | TGCTCGCGTCCACTATCCAGT    |
| <i>Roseburia spp.</i>          | GCGGTRCGGCAAGTCTGA       | CCTCCGACACTCTAGTMCGAC    |
| <i>Lactobacillus</i>           | CACCGCTACACATGGAG        | AGCAGTAGGGAATTCTTCCA     |
| <i>Clostridium coccoides</i>   | CGGTGACTAATACCGCATAACGG  | CCTTGCCGCTACTCTCC        |
| <i>Enterococcus spp.</i>       | CCCTTATTGTTAGTTGCCATCATT | ACTCGTTGTACTIONTCCCATTGT |
| <i>Enterobacteriaceae spp.</i> | GTGCCAGCMGCCGCGGTAA      | GCCTCAAGGGCACAACCTCCAAG  |

**Table S3** Immune organ indexes. Data were mean  $\pm$  SEM (n = 10). Significance was accepted at # p < 0.05, ## p < 0.01, ### p < 0.001 vs. the normal group; \* p < 0.05, \*\* p < 0.01, \*\*\* p < 0.001 vs. the model group.

| <b>Group</b>          | <b>N</b>         | <b>M</b>            | <b>C</b>         | <b>AL</b>        | <b>AM</b>       | <b>AH</b>        |
|-----------------------|------------------|---------------------|------------------|------------------|-----------------|------------------|
| <b>(mg/10 g b.w.)</b> |                  |                     |                  |                  |                 |                  |
| Spleen index          | 21.59 $\pm$ 3.04 | 13.46 $\pm$ 2.17### | 12.29 $\pm$ 2.28 | 14.06 $\pm$ 3.39 | 13.01 $\pm$ .27 | 14.34 $\pm$ 2.95 |
| Thymus index          | 16.23 $\pm$ 3.27 | 4.68 $\pm$ 1.96###  | 5.78 $\pm$ 2.39  | 5.17 $\pm$ 1.72  | 5.08 $\pm$ 1.97 | 5.69 $\pm$ 2.06  |
